# Supplementary material for: High-Dimensional Mass Cytometry Analysis of Embryonic Antigens and Their Signaling Pathways in Myeloid Cells from Bone Marrow Aspirates in AML Patients at Diagnosis
Source: MDPI journal article supplement (doi:10.3390/cancers15194707), 2023-09-25
Supplement: s1 [file s1]

Figure S1: The manual gating strategy for the identification of cell populations.

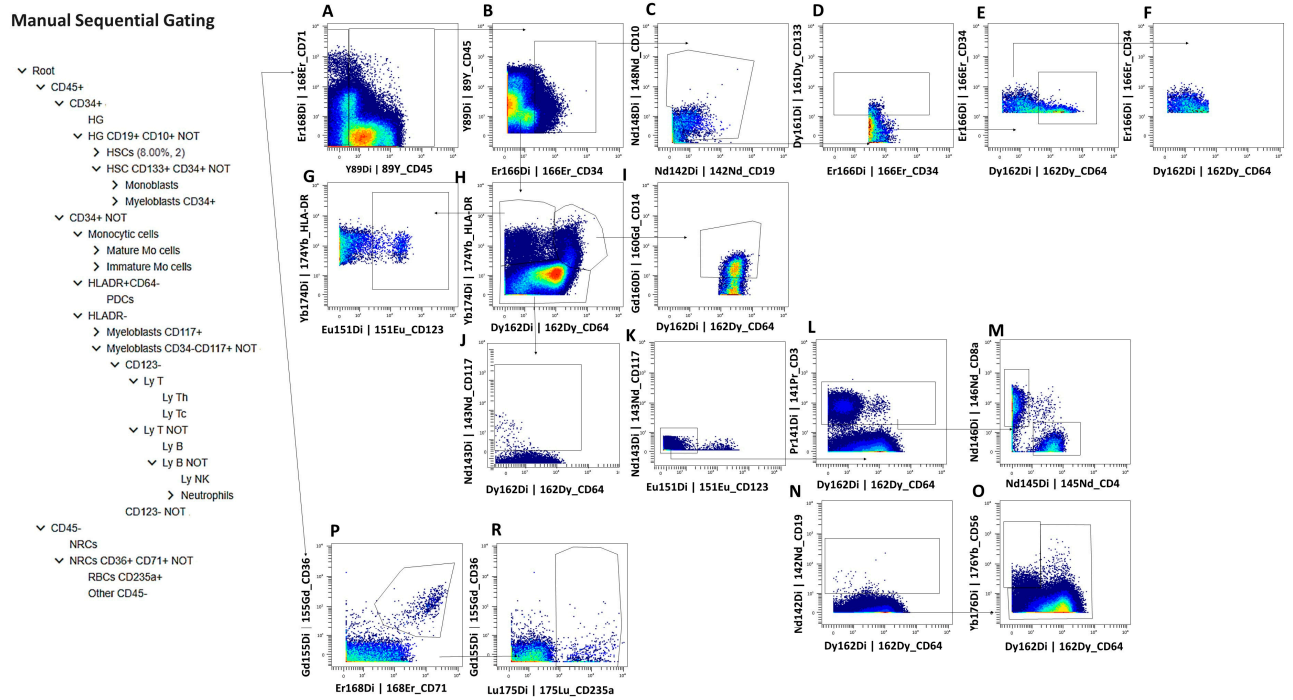

(A) Selection of CD45+ cells. (B) Selection of CD34+ cells. (C) Removal of CD10+CD19+ hematogones (HGs) from the CD34+ cell gate. (D) Selection of CD133+ hematopoietic stem cells (HSCs) within the CD34+ cell gate after HG removal. (E) Selection of CD64+ monoblasts within the CD34+ cell gate after exclusion of CD133+ HSCs and HGs. (F) The remaining CD34+ myeloblasts. (G) Selection of CD123+HLA-DR- basophils from among the CD64+low/-HLA-DR- cells. (H) Selection of CD64+HLA-DR+ monocytic cells and CD64+low/-HLA-DR- neutrophils. (I) Selection of CD14+CD64+ more mature monocytic cells. (J) Selection of CD117+ cells from among CD64+low/-HLA-DR+low/- cells. (K) Selection of CD117-CD123- cells. (L) Selection of CD3+ T-lymphocytes. (M) Selection of CD8+ cytotoxic T-lymphocytes and CD4+ helper T-lymphocytes. (N) Selection of CD19+ B-lymphocytes. (O) Selection of CD56+ lymphocytes. (P) Selection of CD36+CD71+ erythroid cells. (R) Selection of CD235a+ erythrocytes.

Figure S2: Representative dot plots for immunophenotypic characterization of immature BM cells

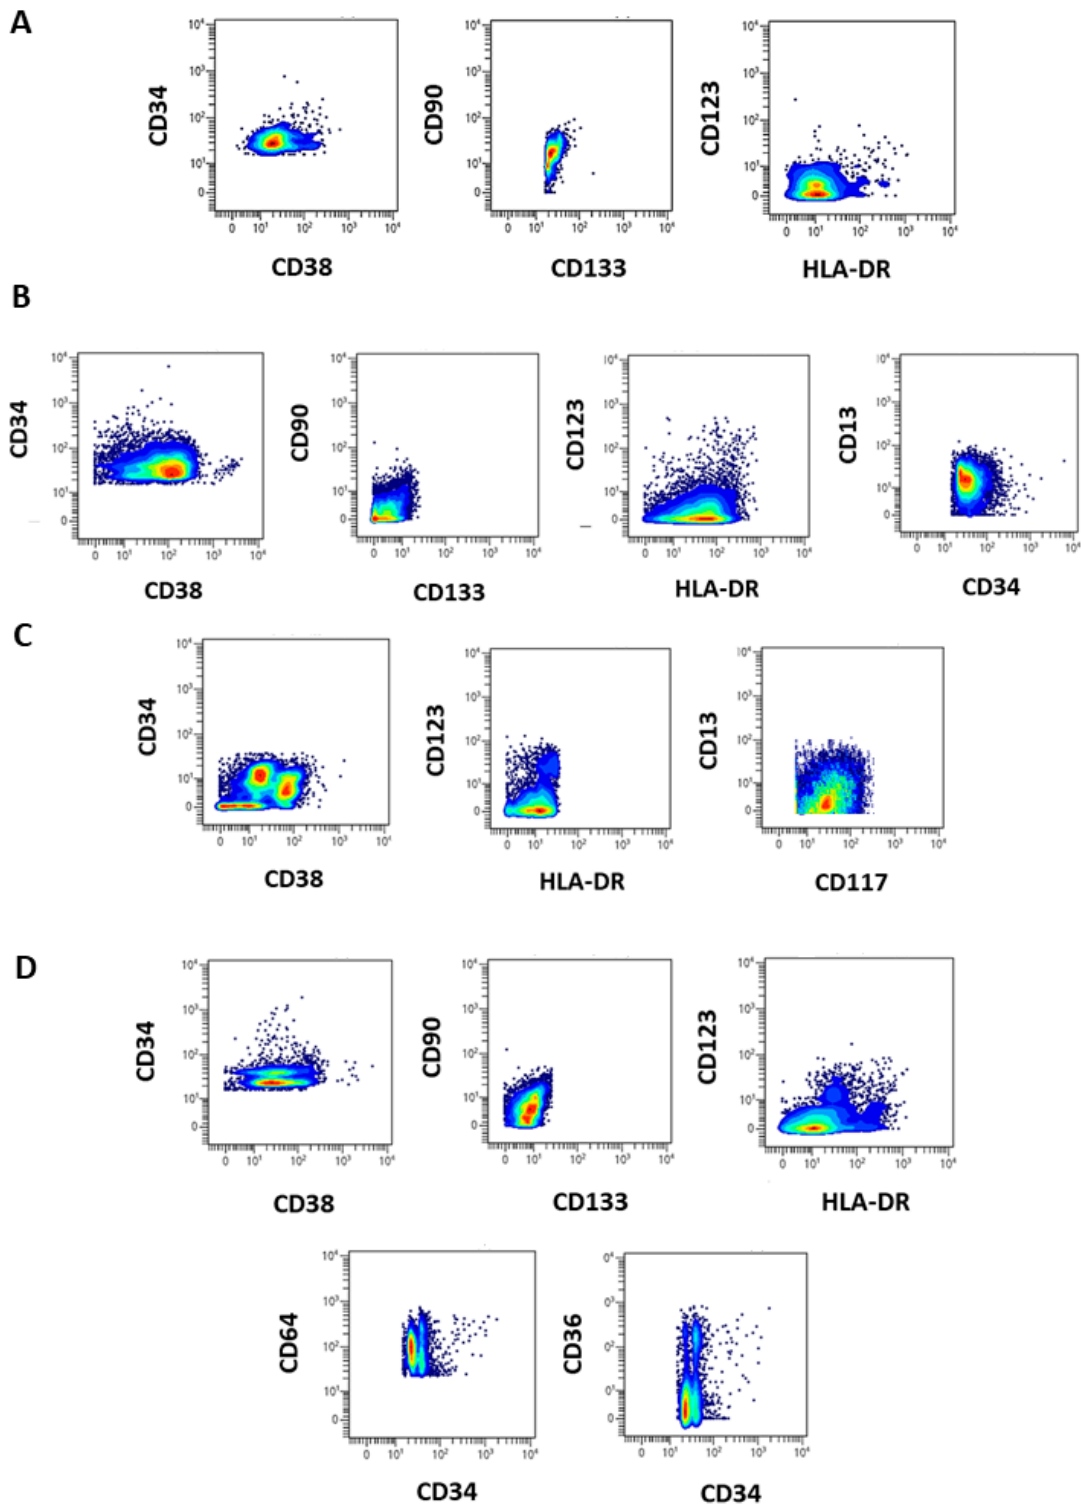

(A) Hematopoietic stem cells (HSCs) CD34<sup>+</sup> CD38<sup>low</sup> CD90<sup>low</sup> CD133<sup>low</sup> HLA-DR<sup>-/+low</sup>; (B) CD34<sup>+</sup> Myeloblasts CD34<sup>+</sup> CD38<sup>low</sup> CD90<sup>-</sup> CD133<sup>-</sup> HLA-DR<sup>low</sup> CD13<sup>+/-</sup>; (C) CD117<sup>+</sup> Myeloblasts CD34<sup>-</sup> CD38<sup>+</sup> CD123<sup>-/+</sup> HLA-DR<sup>low/-</sup> CD117<sup>+</sup> CD13<sup>+/-</sup>; (D) Monoblasts CD34<sup>low</sup> CD38<sup>+</sup> CD90<sup>-/+low</sup> CD133<sup>-/+low</sup> HLA-DR<sup>low</sup> CD64<sup>+</sup> CD36<sup>-/+</sup>

Figure S3: Distribution of the immature myeloid populations in NBM, AML M4/M5, and AML non M4/M5 settings

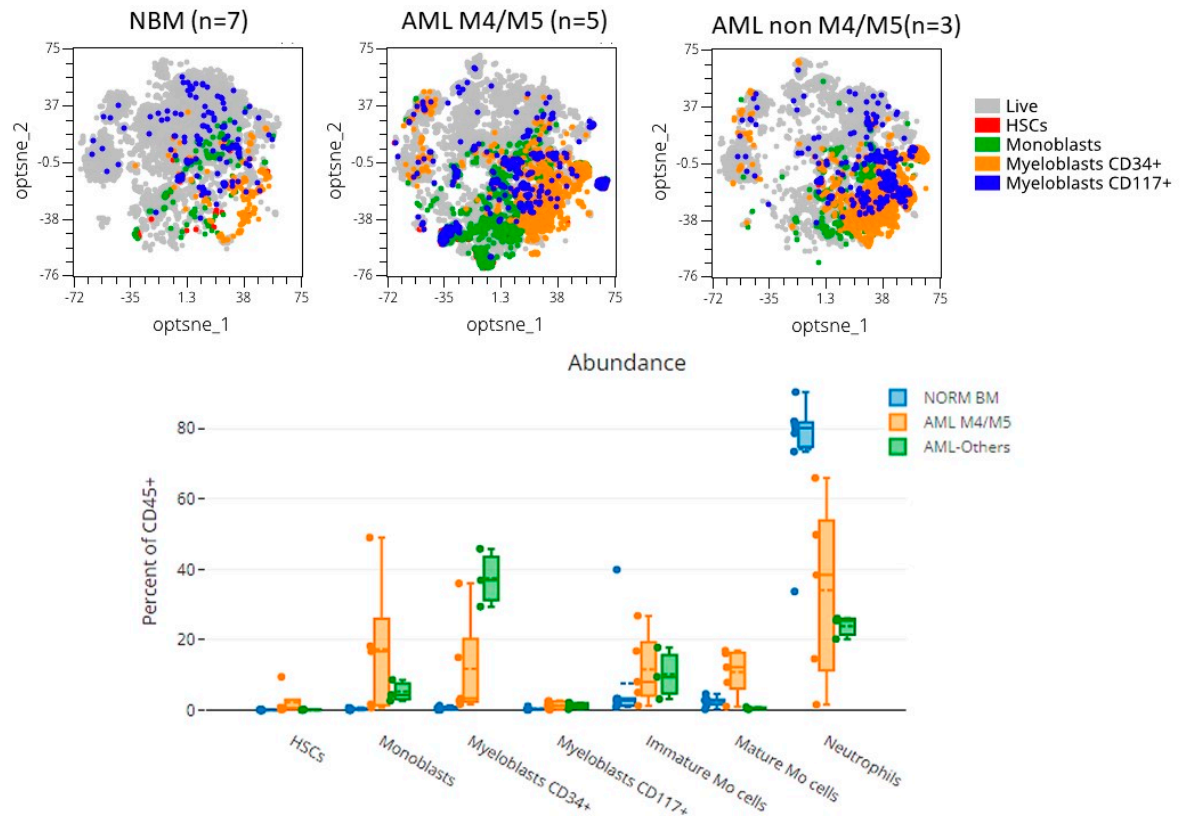

(A) opt-SNE visualization of the distribution of the immature myeloid cells in the bone marrow aspirates from the three groups of cases; (B) Cell population frequencies among CD45-positive leukocytes from normal controls (NBM; blue columns), AML with monocytic component (M4/M5, orange) and AML without monocytic component (non M4/M5, green).

**Table S1.** Mass cytometry antibody panel.

| Label | Target                         | Clone     |
|-------|--------------------------------|-----------|
| 089Y  | CD45                           | HI30      |
| 141Pr | CD3                            | UCHT1     |
| 142Nd | CD19                           | HIB19     |
| 143Nd | CD117 (c-KIT)                  | 104D2     |
| 144Nd | CD15 (SSEA-1)                  | W6D3      |
| 145Nd | CD4                            | RPA-T4    |
| 146Nd | CD8a                           | RPA-T8    |
| 147Sm | $\beta$ -catenin               | D10A8     |
| 148Nd | CD10                           | HI10a     |
| 149Sm | SSEA-3                         | MC-631    |
| 150Nd | SOX2                           | O30-678   |
| 151Eu | CD123 (IL-3R)                  | 6H6       |
| 152Sm | CD13                           | WM15      |
| 153Eu | CD7                            | CD7-6B7   |
| 154Sm | CD33                           | P67.6     |
| 155Gd | CD36                           | 5-271     |
| 156Gd | p-p38 [T180/Y182]              | D3F9      |
| 158Gd | p-STAT3 [Y705]                 | 4/P-Stat3 |
| 159Tb | CD90                           | 5E10      |
| 160Gd | CD14                           | M5E2      |
| 161Dy | CD133                          | AC133     |
| 162Dy | CD64                           | 10.1      |
| 163Dy | CD105 (endoglin)               | 43A3      |
| 164Dy | CD49F                          | G0H3      |
| 165Ho | OCT3/4                         | 40/Oct-3  |
| 166Er | CD34                           | 581       |
| 167Er | CD38                           | HIT2      |
| 168Er | CD71<br>(transferrin receptor) | OKT-9     |
| 169Tm | Nanog                          | N31-355   |
| 170Er | CD45RA                         | HI100     |
| 171Yb | CD20                           | 2H7       |

|       |               |          |
|-------|---------------|----------|
| 173Yb | STAT3         | 124H6    |
| 174Yb | HLA-DR        | L243     |
| 175Lu | CD235ab       | HIR2     |
|       | (glycophorin) |          |
| 176Yb | CD56 (NCAM)   | NCAM16.2 |
| 209Bi | CD16          | 3G8      |

Table S2. Sample Preparation for Mass Cytometry Analysis

| Steps # |                                                                                                                                                                                                                                                                                                                                                                                                                                                                                                                                                                               |
|---------|-------------------------------------------------------------------------------------------------------------------------------------------------------------------------------------------------------------------------------------------------------------------------------------------------------------------------------------------------------------------------------------------------------------------------------------------------------------------------------------------------------------------------------------------------------------------------------|
| 0       | <p>Perform Bulk Erythrocyte Lysing<br/>(<a href="https://www.bdbiosciences.com/content/dam/bdb/marketing-documents/Multicolor-Bulk-Erythrocyte-Lysing-Protocol.pdf">https://www.bdbiosciences.com/content/dam/bdb/marketing-documents/Multicolor-Bulk-Erythrocyte-Lysing-Protocol.pdf</a>)<br/>Count the cells. If needed, the cells can be kept on Cell wash + FCS (1000 µl cell wash+200 µl FCS)</p>                                                                                                                                                                        |
| 1       | <p><b>From Cells of interest</b><br/>In Eppendorf tubes not autoclaved add around 8 million cells</p>                                                                                                                                                                                                                                                                                                                                                                                                                                                                         |
| 2       | <p><b>Viability Staining - Cisplatin</b><br/>Wash once with 1000 µL MaxPar PBS at RT<br/>Add 1000 µL of Cisplatin Solution (CisPlatin 10M 2µl/1000µl in pre warmed medium without FCS) per Eppendorf,<br/>Remove Cisplatin Solution (centrifuge cell suspension at 800 x g for 5 minutes).<br/>Add 1000-1500µL CSB. Filter the cells. Count the cells. Wash twice with CSB at RT<br/>(centrifuge cell suspension at 800 x g for 5 minutes).</p>                                                                                                                               |
| 3       | <p><b>Block surface Fc Receptors</b><br/>Add 50 µL of Fc Block/ sample, mix by pipetting (refer to product data sheet to verify dilution of stock for the Fc block antibody used)<br/>Incubate 10 minutes at RT</p>                                                                                                                                                                                                                                                                                                                                                           |
| 4       | <p><b>Fixation</b><br/>Add 500 µL of Fix I buffer (1X = dilution 1/5)/ sample<br/>Incubate 10 minutes at RT<br/>Wash with 1000 µL CSB/ sample (centrifuge cell suspension at 800 x g for 5 minutes)</p>                                                                                                                                                                                                                                                                                                                                                                       |
| 5       | <p><b>Surface Staining</b><br/>Add 50 µL of surface antibody mix per sample<br/>Incubate 30 minutes at RT<br/>Wash 1000 µL CSB/ sample (centrifuge cell suspension at 800 x g for 5 minutes)</p>                                                                                                                                                                                                                                                                                                                                                                              |
| 6       | <p><b>Phosphorylated proteins +Intracellular Antigens staining</b><br/>Resuspend cells in residual volume<br/>Add 1 mL of cold 4°C MeOH, mix gently and incubate for 15 minutes on ice<br/>Add 500 µL of CSB, centrifuge cell suspension at 800 x g for 5 minutes<br/>Wash a second time with 1.5 mL of CSB<br/>Resuspend cells in residual volume and add 50 µL of phosphorylated proteins +intracellular antibodies cocktail<br/>Gently pipet to mix samples then incubate for 30 minutes at RT<br/>Wash with CSB (centrifuge cell suspension at 800 x g for 5 minutes)</p> |
| 7       | <p><b>Fresh fix</b><br/>Resuspend cells in 1000 µL 3.2 % PFA solution (200µl PFA + 800µl PBS/ 1 sample)<br/>Incubate 10 minutes at RT<br/>Centrifuge cell suspension at 800 x g for 5 minutes, discard supernatant</p>                                                                                                                                                                                                                                                                                                                                                        |
| 8       | <p><b>Fixation overnight</b><br/>Resuspend cell pellet in 500uL <b>Cytofix + 1/1000 Iridium</b></p>                                                                                                                                                                                                                                                                                                                                                                                                                                                                           |

Incubate overnight at 4°C

**9 Freezing**

Add 500 µl CSB. Resuspend the cells. Count the cells.

Centrifuge cell suspension at 800 x g for 5 minutes, discard supernatant.

Add "freezing solution": 135 µl CSB+ 7.5 µl DMSO + 7.5 µl PBS/ sample

Resuspend pellet in the "freezing solution"

Place tubes at -80°C

**10 Cell preparation for acquisition**

Thaw sample on ice

Add 1000 µl CAS solution. Count the cells

Centrifuge cell suspension at 800 x g for 5 minutes, discard supernatant

Resuspend cells in CAS solution + 10% EQ beads for a final concentration of 200.000 cells / mL

Acquire sample by mass cytometry

**FCS**, fetal Calf Serum; **PBS**, Phosphate-buffered saline; **RT**, Room Temperature; **CSB**, Cell Staining Buffer; **CAS**, Cell Acquisition Solution; **MeOH**, Methanol; **PFA**, Paraformaldehyde; **DMSO**, Dimethylsulfoxide; **EQ beads**, EQ™ Four Element Calibration Beads
